# Supplementary material for: Be Aggressive! Amorphous Excipients Enabling Single-Step Freeze-Drying of Monoclonal Antibody Formulations
Source: PubMed Central journal article supplement (PMC6920930; doi:10.3390/pharmaceutics11110616), 2019-11-17
Supplement: pharmaceutics-11-00616-s001.pdf [file pharmaceutics-11-00616-s001.pdf]

# Supplementary Materials: Be Aggressive! Amorphous Excipients Enabling Single-Step Freeze-Drying of Monoclonal Antibody Formulations

Christina Haeuser, Pierre Goldbach, Joerg Huwyler, Wolfgang Friess  
and Andrea Allmendinger

Table S1 shows the composition of the different formulations. F<sub>s</sub> served as reference formulation throughout this study.

**Table S1.** Formulation composition. All formulations were prepared in 20 mM histidine/histidine-HCl buffer pH 6.0 containing 0.02% polysorbate 20.

| Formulation         | mAb (mg/mL) | Sucrose (mg/mL) | HPBCD (mg/mL) | PVP (mg/mL) |
|---------------------|-------------|-----------------|---------------|-------------|
| F <sub>s</sub>      | 10          | 80              | -             | -           |
|                     | 50          |                 |               |             |
| F <sub>CD</sub>     | 10          | 80              | -             | -           |
|                     | 50          |                 |               |             |
| F <sub>CD/P/S</sub> | 10          | 24              | 39.2          | 16.8        |
|                     | 50          |                 |               |             |
| F <sub>CD/S</sub>   | 10          | 24              | 56            |             |
|                     | 50          |                 |               |             |

HPBCD: 2-hydroxypropyl-betacyclodextrin.

PVP: Polyvinylpyrrolidone.

Figure S1 shows the reconstitution times of 10 mg/mL and 50 mg/mL mAb formulations freeze-dried with different cycle parameters. For 10 mg/mL mAb formulations reconstitution times were comparable for all formulations and cycle conditions. Reconstitution of 50 mg/mL mAb formulations took generally longer and reconstitution of F<sub>s</sub> took around 80 s (s) longer compared to F<sub>CD</sub>, F<sub>CD/P/S</sub>, and F<sub>CD/S</sub>, independent of the cycle employed.

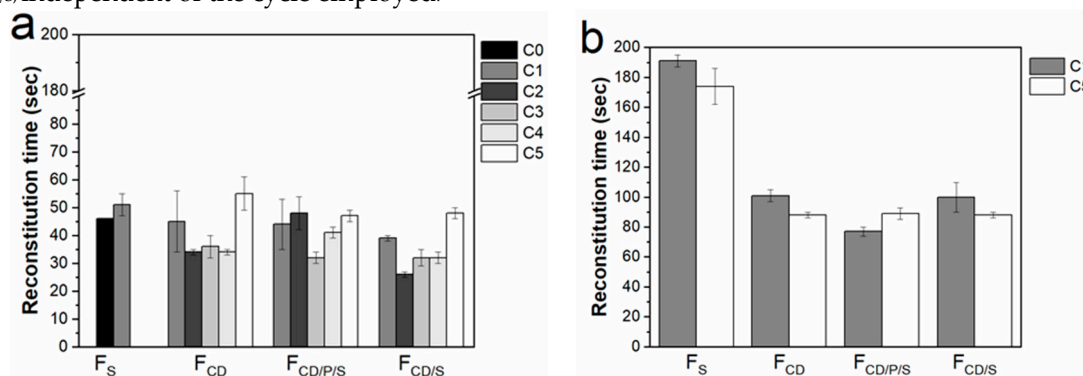

**Figure S1.** Reconstitution time of lyophilisates. a) 10 mg/mL mAb formulations and b) 50 mg/mL mAb formulations freeze-dried with different cycles.

Figure S2 shows the specific surface areas of 10 mg/mL and 50 mg/mL mAb formulations freeze-dried with different cycle parameters. In general, F<sub>s</sub> showed a slightly lower specific surface area compared to F<sub>CD</sub>, F<sub>CD/P/S</sub>, and F<sub>CD/S</sub>. In addition, F<sub>s</sub> at 10 mg/mL mAb, when freeze-dried with C1 had a lower specific surface area, which is indicative for the collapsed lyophilisate.

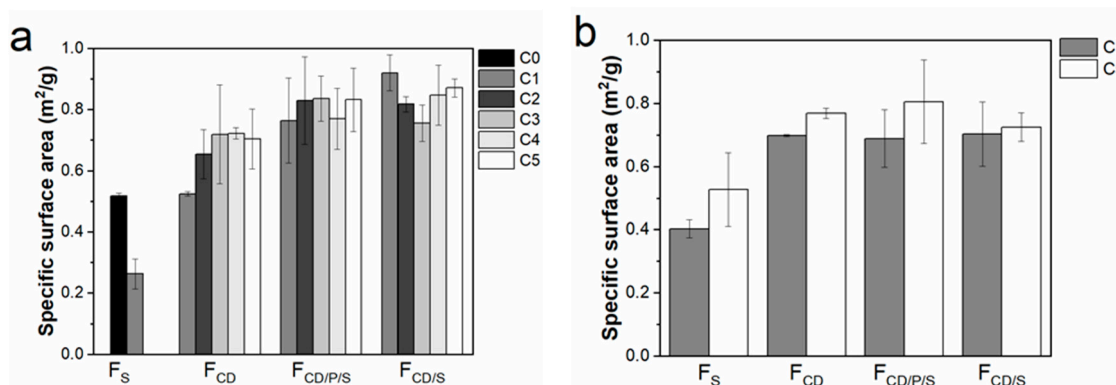

**Figure S2.** Specific surface area of lyophilisates. a) 10 mg/mL mAb formulations and b) 50 mg/mL mAb formulations freeze-dried with different cycles.

Figure S3 shows mAb stability after 3 months 40 °C of 10 mg/mL lyophilisates that were spiked to different residual moisture levels to investigate whether very low residual moisture levels might be detrimental to mAb stability during storage. Stability was not affected in a moisture level range between 0.2% and 2%.

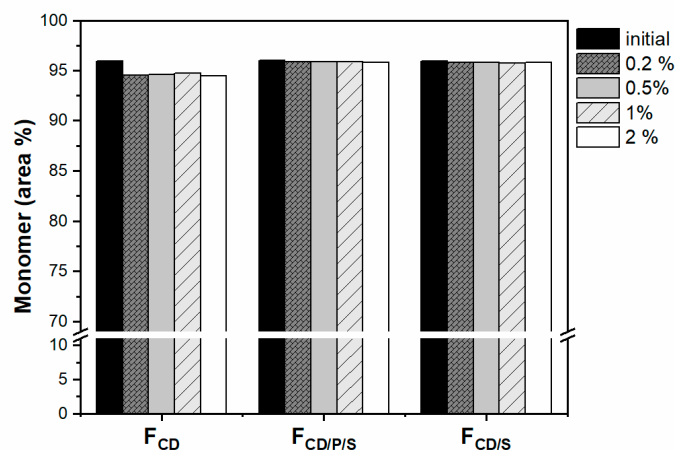

**Figure S3.** Protein stability dependent on residual moisture (in %). Monomer content by SE-HPLC is given for 10 mg/mL formulations after freeze-drying and after storage for 3 months at 40 °C.

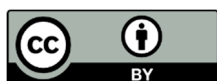

© 2019 by the authors. Submitted for possible open access publication under the terms and conditions of the Creative Commons Attribution (CC BY) license (<http://creativecommons.org/licenses/by/4.0/>).
